# Supplementary material for: Creating hierarchical pores in metal–organic frameworks via postsynthetic reactions
Source: Springer Nature journal article supplement (doi:10.1038/s41596-022-00759-7), 2022-10-28
Supplement: 41596_2022_759_MOESM1_ESM.pdf [file 41596_2022_759_MOESM1_ESM.pdf]

## Supplementary information

---

# Creating hierarchical pores in metal–organic frameworks via postsynthetic reactions

---

In the format provided by the  
authors and unedited

## SUPPLEMENTARY INFORMATION

### Creating Hierarchical Pores in Metal–Organic Frameworks via Post-Synthetic Reactions

Kun-Yu Wang<sup>1</sup>, Zhentao Yang<sup>1</sup>, Jiaqi Zhang<sup>1</sup>, Sayan Banerjee<sup>1</sup>, Elizabeth A. Joseph<sup>1</sup>, Yu-Chuan Hsu<sup>1</sup>, Shuai Yuan<sup>1,2</sup>, Liang Feng<sup>1</sup> & Hong-Cai Zhou<sup>1,3</sup>

<sup>1</sup> Department of Chemistry, Texas A&M University, College Station, Texas, United States.

<sup>2</sup> State Key Laboratory of Coordination Chemistry, School of Chemistry and Chemical Engineering, Nanjing University, Nanjing, Jiangsu, China

<sup>3</sup> Department of Materials Science and Engineering, Texas A&M University, College Station, Texas, United States.

Correspondence should be addressed to [syuan@nju.edu.cn](mailto:syuan@nju.edu.cn); [fengliang@tamu.edu](mailto:fengliang@tamu.edu); [zhou@chem.tamu.edu](mailto:zhou@chem.tamu.edu).

## Table of Contents

|                                                                                                                                                  |    |
|--------------------------------------------------------------------------------------------------------------------------------------------------|----|
| <b>Supplementary Figure 1</b>   $^1\text{H}$ NMR spectrum of the $\text{H}_4\text{ABTC}$ in $\text{DMSO-}d_6$ .....                              | 3  |
| <b>Supplementary Figure 2</b>   $^1\text{H}$ NMR spectrum of the $\text{H}_2\text{CBAB}$ in $\text{DMSO-}d_6$ .....                              | 3  |
| <b>Supplementary Figure 3</b>   $^1\text{H}$ NMR spectrum of the $\text{H}_2\text{AZDC}$ in $\text{DMSO-}d_6$ .....                              | 3  |
| <b>Supplementary Figure 4</b>   $^1\text{H}$ NMR spectrum of the decomposed PCN-160-CBAB-R% in $\text{DMSO-}d_6$ .....                           | 4  |
| <b>Supplementary Figure 5</b>   $^1\text{H}$ NMR spectrum of the decomposed UiO-66-NH <sub>2</sub> -R% in $\text{DMSO-}d_6$ .....                | 4  |
| <b>Supplementary Figure 6</b>   $^1\text{H}$ NMR spectrum of the UiO-66-NH <sub>2</sub> -R% that were treated under 350°C.....                   | 4  |
| <b>Supplementary Figure 7</b>   Powder X-ray diffraction results of the PCN-250 before and after Soxhlet washing.....                            | 5  |
| <b>Supplementary Figure 8</b>   Powder X-ray diffraction results of the PCN-160 powder and single crystals.....                                  | 5  |
| <b>Supplementary Figure 9</b>   Powder X-ray diffraction results of the PCN-160-CBAB-15.3% before and after linker hydrolysis.....               | 6  |
| <b>Supplementary Figure 10</b>   Powder X-ray diffraction results of the PCN-160-CBAB-47.3% before and after linker hydrolysis.....              | 6  |
| <b>Supplementary Figure 11</b>   Powder X-ray diffraction results of the UiO-66-NH <sub>2</sub> -5% before and after treatment under 350°C.....  | 7  |
| <b>Supplementary Figure 12</b>   Powder X-ray diffraction results of the UiO-66-NH <sub>2</sub> -28% before and after treatment under 350°C..... | 7  |
| <b>Supplementary Figure 13</b>   Nitrogen sorption isotherms of the hierarchically porous (HP) PCN-160-CBAB-7%.....                              | 8  |
| <b>Supplementary Figure 14</b>   Pore size distribution of the hierarchically porous (HP) PCN-160-CBAB-7%.....                                   | 8  |
| <b>Supplementary Figure 15</b>   SEM images of (a) UiO-66-NH <sub>2</sub> -28% and (b) UiO-66-NH <sub>2</sub> -28%-350°C.....                    | 9  |
| <b>Supplementary Figure 16</b>   SEM images of (a) pristine PCN-250 and (b) PCN-250 after Soxhlet washing.....                                   | 9  |
| <b>Supplementary Table 1</b>   Porosity analysis of hierarchically porous MOFs reported in the protocol.....                                     | 10 |

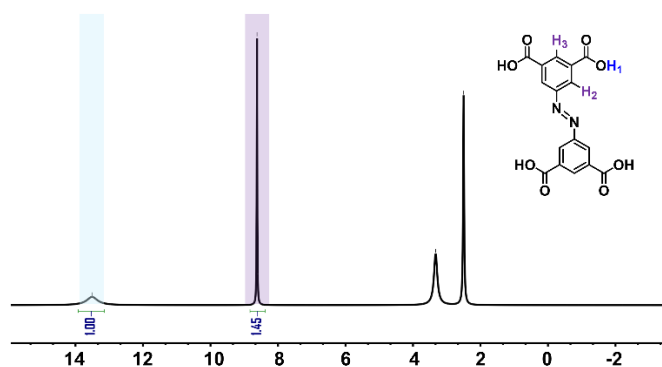

**Supplementary Figure 1** |  $^1\text{H}$  NMR spectrum of the  $\text{H}_4\text{ABTC}$  in  $\text{DMSO-}d_6$ . Note that the chemical shifts of  $\text{H}_2$  and  $\text{H}_3$  are too close to be distinguished. The peaks at 2.5 and 3.3 can be attributed to  $\text{DMSO}$  and  $\text{DMSO-}d_6$ , respectively.

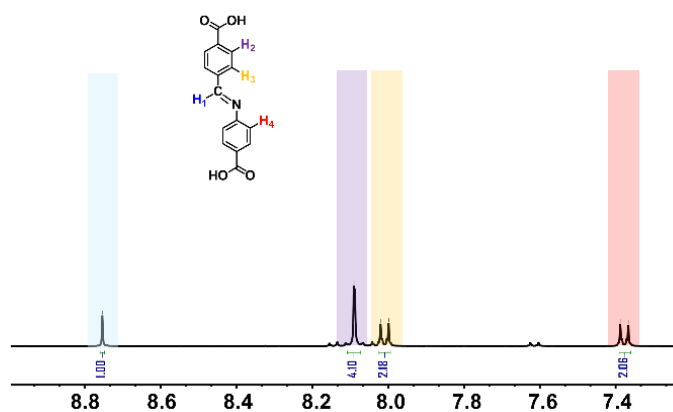

**Supplementary Figure 2** |  $^1\text{H}$  NMR spectrum of  $\text{H}_2\text{CBAB}$  in  $\text{DMSO-}d_6$ .

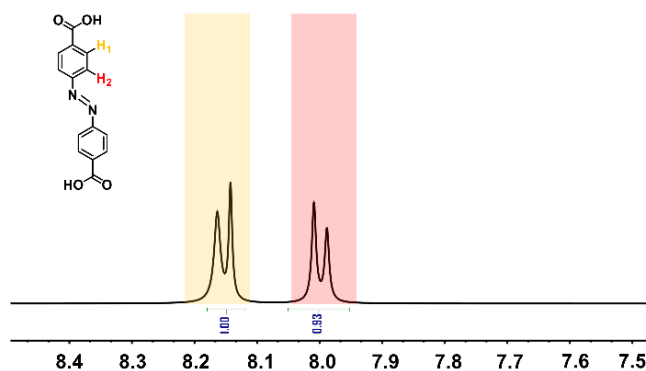

**Supplementary Figure 3** |  $^1\text{H}$  NMR spectrum of  $\text{H}_2\text{AZDC}$  in  $\text{DMSO-}d_6$ .

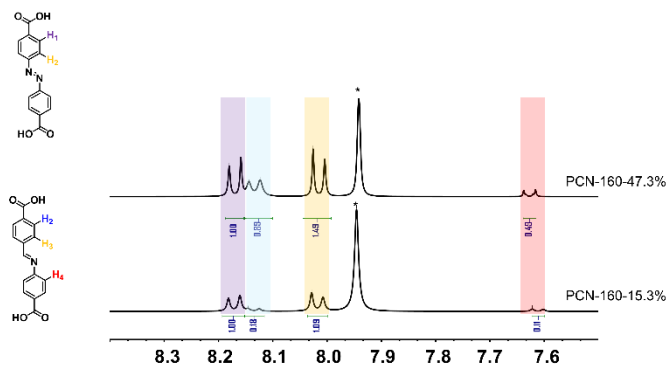

**Supplementary Figure 4** |  $^1\text{H}$  NMR spectrum of the decomposed PCN-160-CBAB-R% in  $\text{DMSO-}d_6$ . The peak with a star sign indicates the DMF residue.

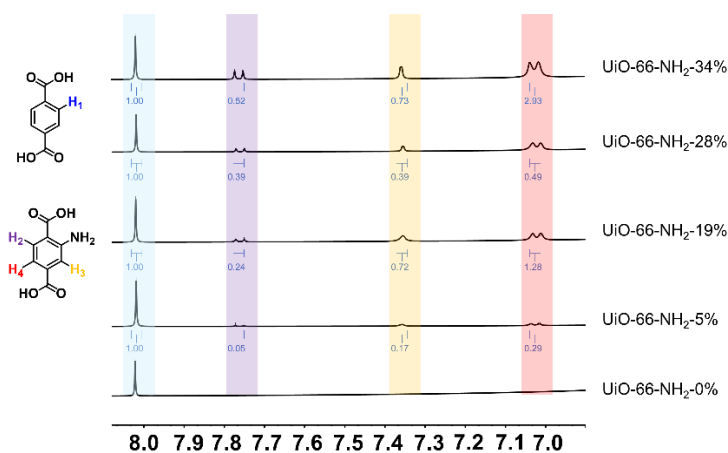

**Supplementary Figure 5** |  $^1\text{H}$  NMR spectrum of the decomposed UiO-66-NH<sub>2</sub>-R% in  $\text{DMSO-}d_6$ .

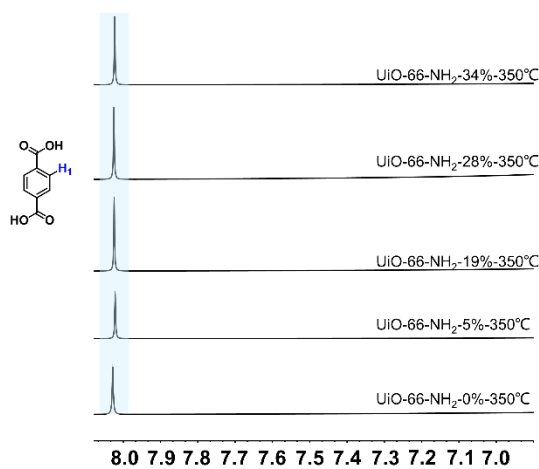

**Supplementary Figure 6** |  $^1\text{H}$  NMR spectrum of the UiO-66-NH<sub>2</sub>-R% treated at 350°C.

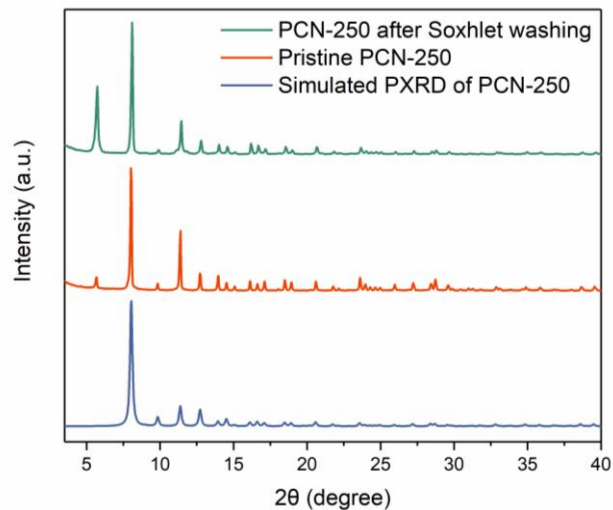

**Supplementary Figure 7** | Powder X-ray diffraction results of the PCN-250 before and after Soxhlet washing. The data was collected on a Bruker Advance D8 powder X-ray diffractometer. a.u. represents arbitrary units.

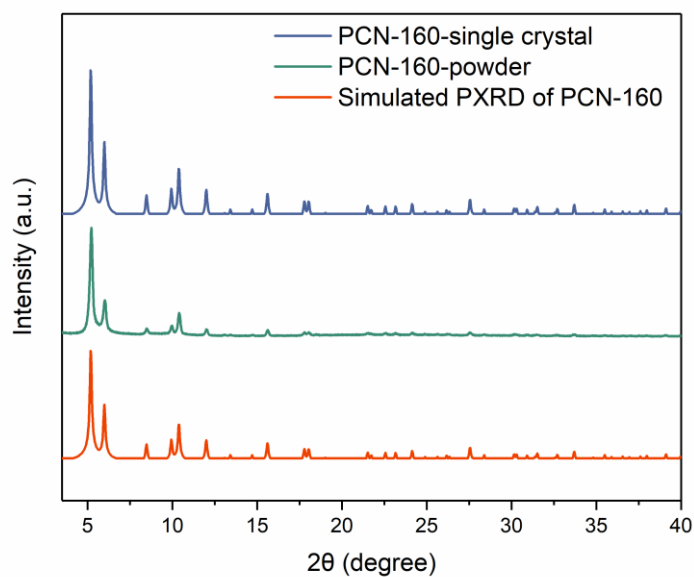

**Supplementary Figure 8** | Powder X-ray diffraction results of the PCN-160 powder and single crystals.

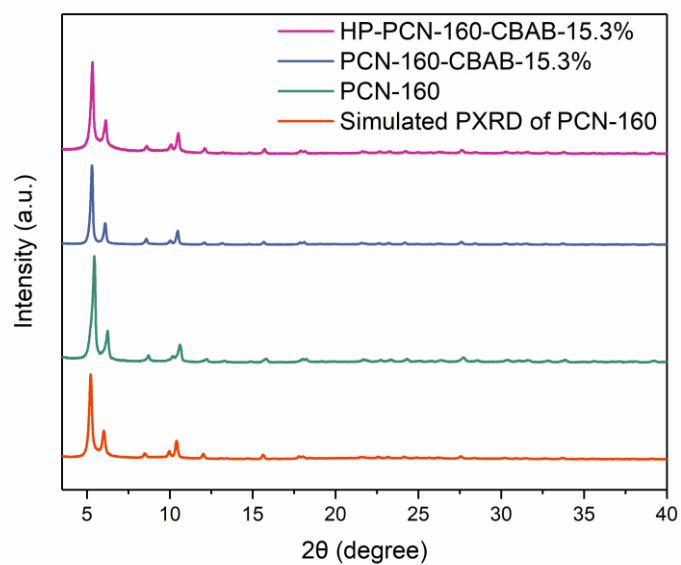

**Supplementary Figure 9** | Powder X-ray diffraction results of the PCN-160-CBAB-15.3% before and after linker hydrolysis.

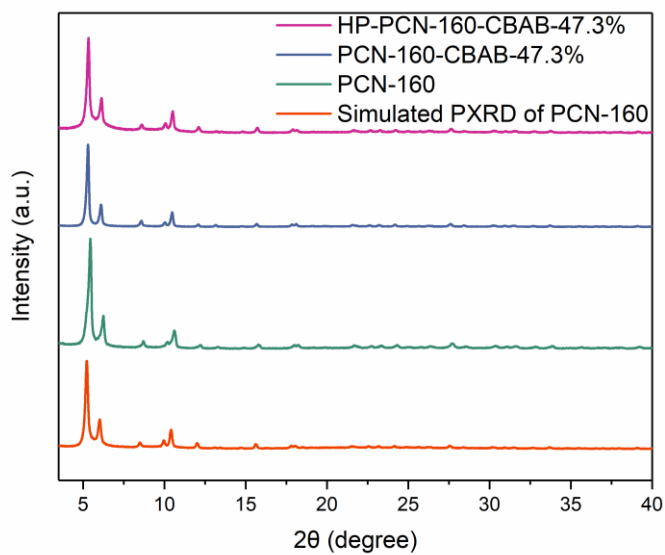

**Supplementary Figure 10** | Powder X-ray diffraction results of the PCN-160-CBAB-47.3% before and after linker hydrolysis.

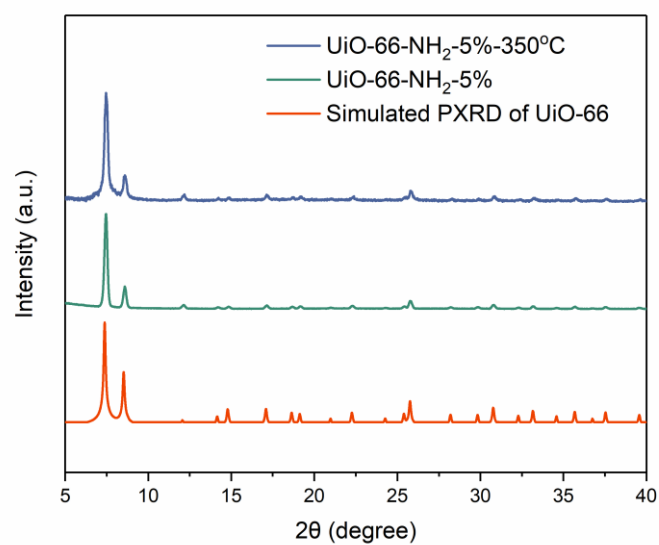

**Supplementary Figure 11** | Powder X-ray diffraction results of the UiO-66-NH<sub>2</sub>-5% before and after treatment under 350°C.

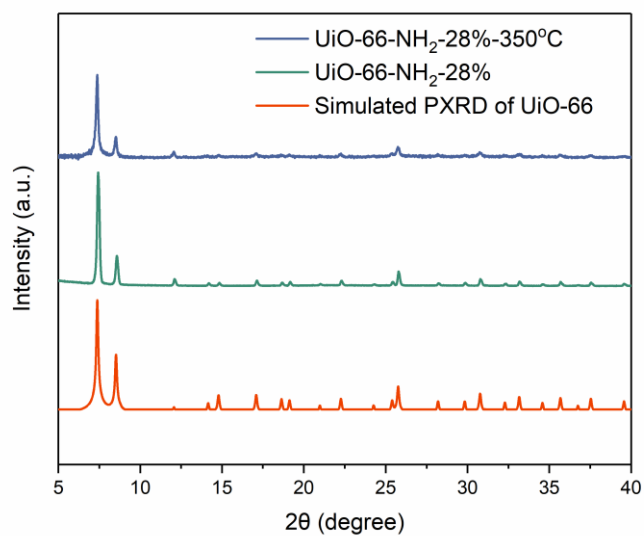

**Supplementary Figure 12** | Powder X-ray diffraction results of the UiO-66-NH<sub>2</sub>-28% before and after treatment under 350°C.



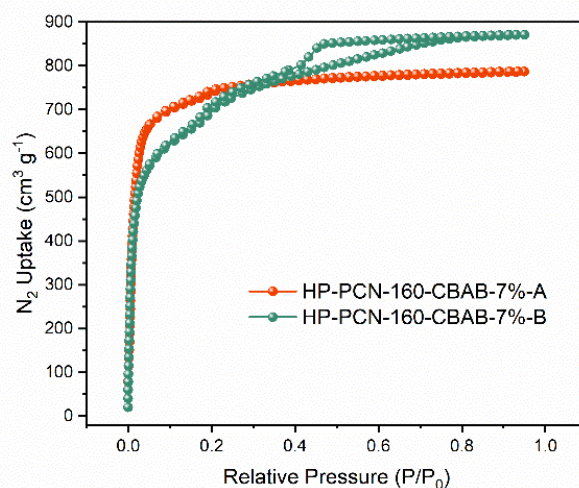

**Supplementary Figure 13** | Nitrogen sorption isotherms of the hierarchically porous (HP) PCN-160-CBAB-7% that are (A) washed with acetone at room temperature and (B) washed with acetone at 40°C.

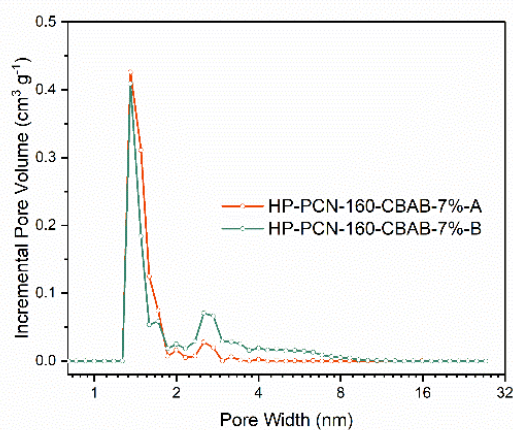

**Supplementary Figure 14** | Pore size distribution of the hierarchically porous (HP) PCN-160-CBAB-7% that are (A) washed with acetone at room temperature and (B) washed with acetone at 40°C.

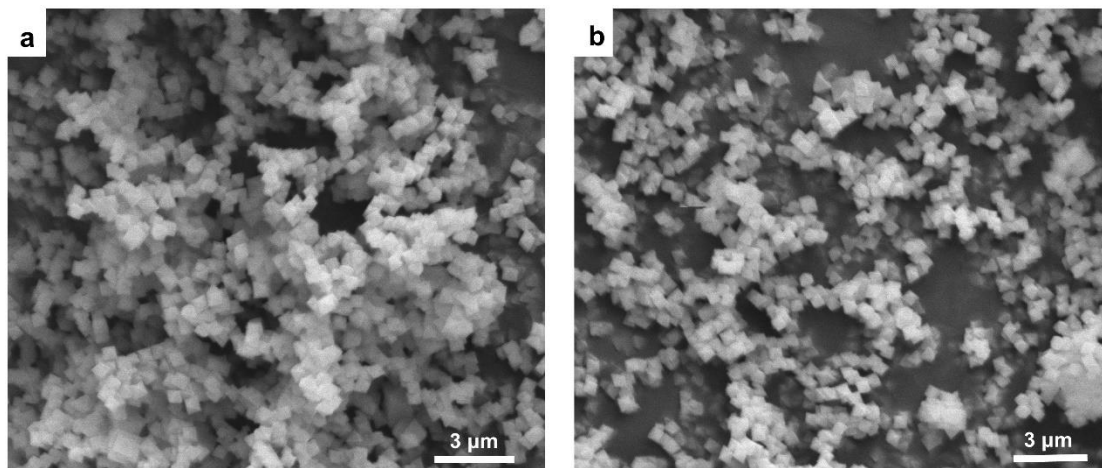

**Supplementary Figure 15** | SEM images of (a) UiO-66-NH<sub>2</sub>-28% and (b) UiO-66-NH<sub>2</sub>-28%-350°C.

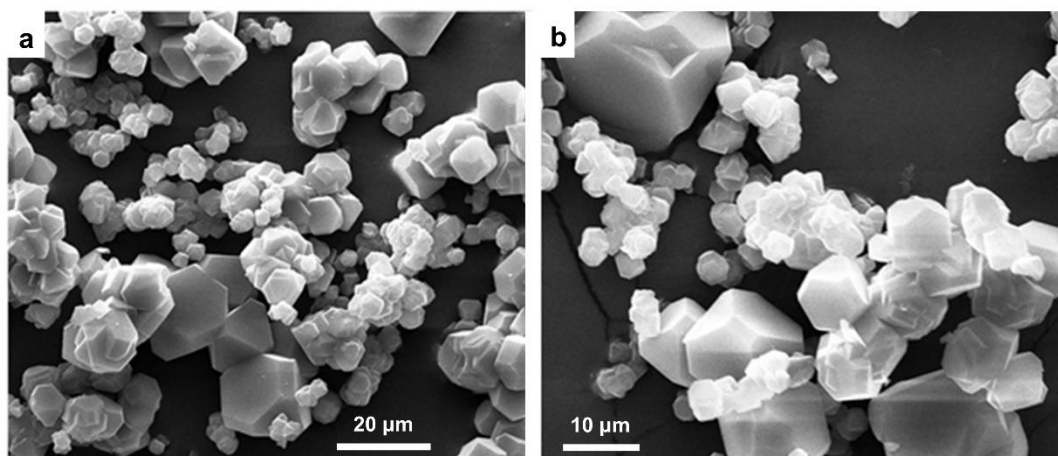

**Supplementary Figure 16** | SEM images of (a) pristine PCN-250 and (b) PCN-250 after Soxhlet washing.

**Supplementary Table 1** | Porosity analysis of hierarchically porous MOFs reported in the protocol.

| MOF                               | $S_{\text{BET}}$ ( $\text{m}^2 \text{g}^{-1}$ ) <sup>A</sup> | $D_{\text{meso}}$ (nm) <sup>B</sup> | $V_{\text{meso}}/V_{\text{micro}}$ <sup>C</sup> |
|-----------------------------------|--------------------------------------------------------------|-------------------------------------|-------------------------------------------------|
| PCN-250 after Soxhlet washing     | 1416                                                         | 6.7                                 | 0.099                                           |
| HP-PCN-160-CBAB-0%                | 2704                                                         | 2.5                                 | 0.036                                           |
| HP-PCN-160-CBAB-15.3%             | 1988                                                         | 6.0                                 | 1.51                                            |
| HP-PCN-160-CBAB-47.3%             | 714                                                          | 14.0                                | 7.55                                            |
| UiO-66-NH <sub>2</sub> -0%-350°C  | 1327                                                         | -                                   | 0                                               |
| UiO-66-NH <sub>2</sub> -5%-350°C  | 902                                                          | 3.5                                 | 1.15                                            |
| UiO-66-NH <sub>2</sub> -19%-350°C | 818                                                          | 3.9                                 | 1.24                                            |
| UiO-66-NH <sub>2</sub> -28%-350°C | 780                                                          | 4.7                                 | 1.67                                            |
| UiO-66-NH <sub>2</sub> -34%-350°C | 890                                                          | 3.5                                 | 1.27                                            |
